# Supplementary material for: Novel therapeutics peptide targeting C16orf74 in biliary tract cancer
Source: Research Square preprint supplement (doi:10.21203/rs.3.rs-6988001/v1), 2025-09-23
Supplement: Supplementary file 1 [file 896528c8f2605ae491174027.xlsx]

## Sheet: Sheet1
Table 1. Patient Characteristics
Factor	Value (n=146)
Age (years) median (range)	69.0 (44-86) quad(64.3-74.4)
Sex (male /female)	112 (76.7%) /34 (23.3%)
Tumor site (PHCC > DBC)	65 (44.5%) / 81 (55.5%)
pT (T1/ T2/ T3/ T4)	2(1.4%) /74(50.7%) /48(32.9%) / 22(15.1%)
pN (N0/ N1/ N2)	79 (54.1%)/ 55 (37.7%) / 12 (8.2%)
Lymphatic invasion (− / +)	73 (50%)
Venous invasion (− / +)	91 (62.3%)
Perineural invasion (− / +)	132 (90.4%)
Residual tumor (0 / 1)	121 (82.9%) / 25 (17.1%)
Adjuvant Chemotherapy (− / +)	22 (15.1%)
Follow-up duration (months)	28 (0.07- 103.2) quad(13.7-56.5)
C16orf74 expression (low/high)	80 (54.8%)/ 66 (45.2%)
PHCC: perihilar cholangiocarcinoma, DBC: distal bile cholangiocarcinoma
