# Supplementary material for: Novel therapeutics peptide targeting C16orf74 in biliary tract cancer
Source: Research Square preprint supplement (doi:10.21203/rs.3.rs-6988001/v1), 2025-09-23
Supplement: Supplementary file 2 [file c3736325c66e3c16bf975344.xlsx]

## Sheet: Sheet1
Table 2. Univariate and multivariate analyses of prognostic factors using the Cox proportional hazards model
Factor	Univariate analysis			Multivariate analysis
	HR	95% CI	P-value	HR	95% CI	P-value
Age (<65 / 66<)	1.13	0.67-1.92	0.64
Sex (male/female)	0.73	0.76-2.49	0.29
Tumor site (PHCC / DBC)	1.1	0.67-1.79	0.71
Tumor size( ≦30 / >30 )	1.27	0.77-2.07	0.35
pT ( <2 / 3< )	0.8	0.47-1.35	0.4
Lymph node metastasis (− / +)	3.42	2.06-5.68	<0.0001	3.67	2.29-5.86	<0.0001
Lymphatic invasion (− / +)	1.11	0.68-1.80	0.67
Venous invasion (− / +)	1.41	0.84-2.37	0.19
Perineural invasion (− / +)	1.31	0.51-3.41	0.57
Residual tumor (0 / 1)	1.3	0.72-2.33	0.38
Adjuvant Chemotherapy (− / +)	0.91	0.48-1.72	0.77
C16orf74 expression (low/high)	1.83	1.13-2.93	0.0127	1.82	1.15-2.86	0.01
HR: hazard ratio, CI: confidence interval, PHCC: perihilar cholangiocarcinoma,
DBC: distal bile cholangiocarcinoma *p < 0.05
